# Supplementary material
Source: MDPI journal article supplement (https://www.mdpi.com/2311-7524/9/2/143)

**Table S1.** Location and details of experimental plots for field screening

|   |                                    |                         |
|---|------------------------------------|-------------------------|
| 1 | Location                           | M/S I & B Seeds         |
| 2 | Season                             | 3 seasons 2 years       |
| 3 | Crop                               | Tomato                  |
| 4 | Design                             | Randomized Block Design |
| 5 | Number of treatments               | 5                       |
| 6 | Number of replications             | 4                       |
| 7 | Plot size                          | 7.2 m x 5 m             |
| 8 | Type of layout for transplantation | Ridges and furrow       |

**Figure S1.** Field layout of the tomato accessions for screening against *P. absoluta* resistance

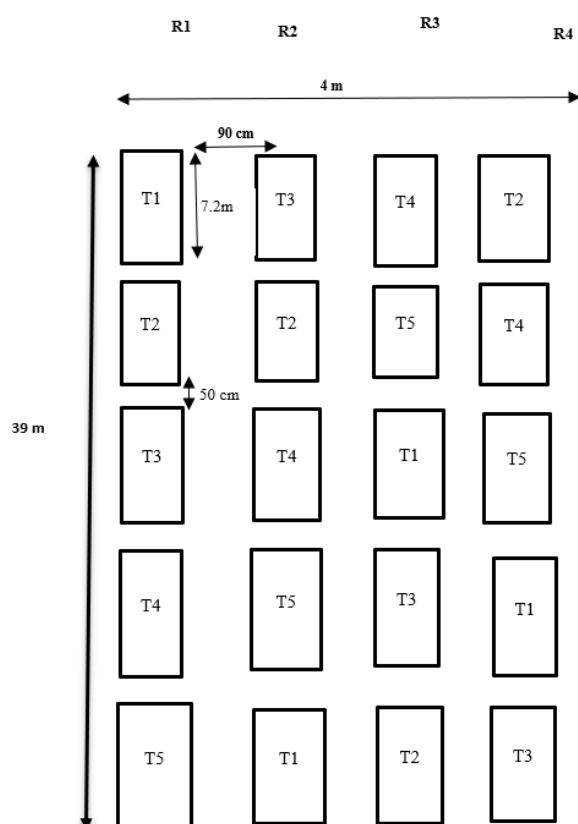

Supplement: s1 [file s1 › horticulturae-2023835-supplementary.pdf]
